# Supplementary material
Source: Elsevier journal article supplement (https://www.sciencedirect.com/science/article/pii/S217357271930133X)

## MATERIAL ADICIONAL

**Tabla 1e.** Criterios para establecer el diagnóstico de estado no-convulsivo. El diagnóstico se efectúa combinando criterios clínicos y electroencefalográficos. (adaptado de<sup>13</sup>)

| Criterios electroencefalográficos                                                                                                                                                                                                                                                                                                                                                                                                                                                                                                                                                                                                                                                                                                                                                                                                                                                                                                                                              |
|--------------------------------------------------------------------------------------------------------------------------------------------------------------------------------------------------------------------------------------------------------------------------------------------------------------------------------------------------------------------------------------------------------------------------------------------------------------------------------------------------------------------------------------------------------------------------------------------------------------------------------------------------------------------------------------------------------------------------------------------------------------------------------------------------------------------------------------------------------------------------------------------------------------------------------------------------------------------------------|
| <p>Pacientes sin estado encefalopático epiléptico:</p> <ul style="list-style-type: none"> <li>• Descargas epileptiformes &gt; 2.5Hz o</li> <li>• Descargas epileptiformes ≤2.5Hz o actividad delta / theta rítmica &gt;0.5Hz y al menos uno de los siguientes: <ul style="list-style-type: none"> <li>○ Evolución temporo espacial típica</li> <li>○ Cuadro clínico epiléptico sutil durante el patrón electroencefalográfico mencionado arriba</li> <li>○ Mejoramiento electroencefalográfico y clínico después de la administración de antiepilépticos endovenosos</li> </ul> </li> </ul> <p>Pacientes en estado encefalopático epiléptico:</p> <ul style="list-style-type: none"> <li>• Aumento de la predominancia o de las frecuencias de las características mencionadas anteriormente en comparación con el EEG basal, más cambio observables del estado clínico</li> <li>• Mejoramiento clínico y de electroencefalográfico con antiepilépticos endovenosos</li> </ul> |
| Criterios clínicos (≥10 minutos de duración)                                                                                                                                                                                                                                                                                                                                                                                                                                                                                                                                                                                                                                                                                                                                                                                                                                                                                                                                   |
| <ul style="list-style-type: none"> <li>• Cambios en el estado de consciencia de minutos a horas (transición de un estado previo al actual)</li> <li>• Paciente no mejora de manera sostenida en los últimos minutos u horas, excepto por fluctuaciones de la consciencia momentáneas</li> <li>• La neuroimagen no explica el patrón electroencefalográfico</li> <li>• Ausencia de alteraciones metabólicas y de electrolitos que pueda explicar el patrón encefalográfico</li> </ul>                                                                                                                                                                                                                                                                                                                                                                                                                                                                                           |

## Figura 1e

El Sistema denominado "10-20" de la Sociedad Internacional de Neurofisiología Clínica Americana<sup>4</sup>, es un sistema standard y universal. Este sistema standard se basa en la medición de la cabeza del paciente utilizando puntos de referencia anatómicos. **A.** La referencia inicial se da por una línea imaginaria entre lo que se llama nasión al iniñon pasando por el vertex. Nasion es el área de la base de la nariz y el iniñon es la protuberancia occipital. En esa línea imaginaria se coloca los electrodos Z (electrodos centrales). Desde el nasión al iniñon se divide en segmentos de 10%, 20%, 20%, 20%, 20% y 10%. **B.** Luego otra línea imaginaria que une a ambas áreas pre auricular y también es dividida en segmentos de 10%, 20%, 20%, 20%, 20% y 10%. **C.** Luego se traza una línea imaginaria circunferencial en la cabeza y se divide en segmentos de 10%. **D.** Después, dos líneas imaginarias para sagitales que se dividen en segmentos de 25%, y finalmente dos líneas transversales que se intersectaran con las líneas para sagitales. La intersección de ambas líneas determina la posición de los últimos electrodos. **E y F.** Una vez que se tienen todos estos puntos de referencia, los electrodos podrán ser colocados.

Figura 1

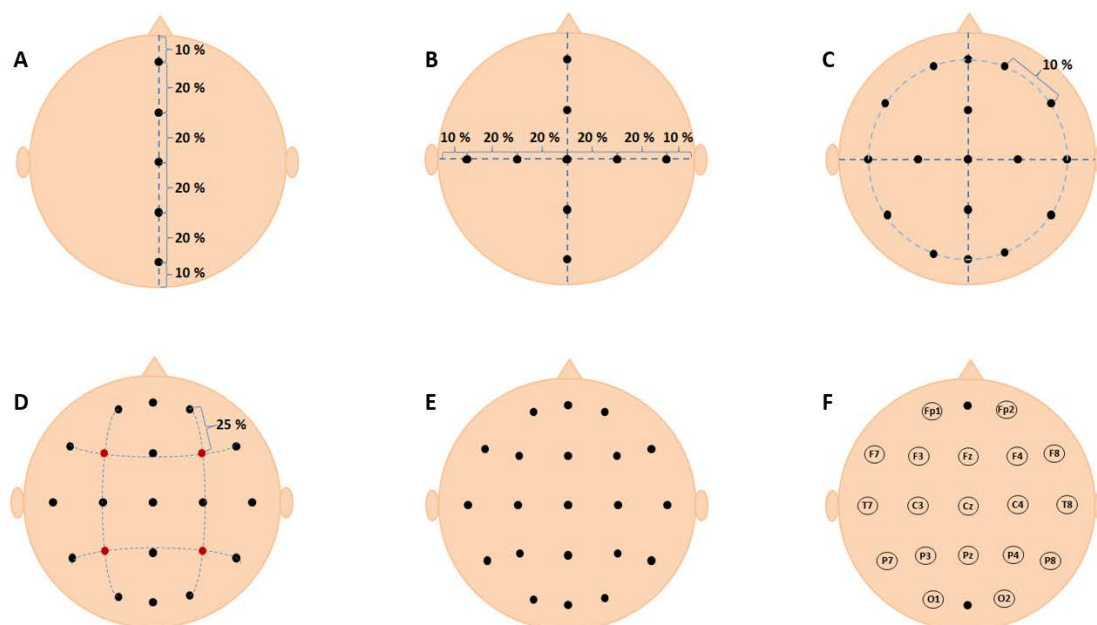

**Figura 2e** Amplificador diferencial: la señal de salida como la diferencia entre las dos entradas eléctricas

Figura 2

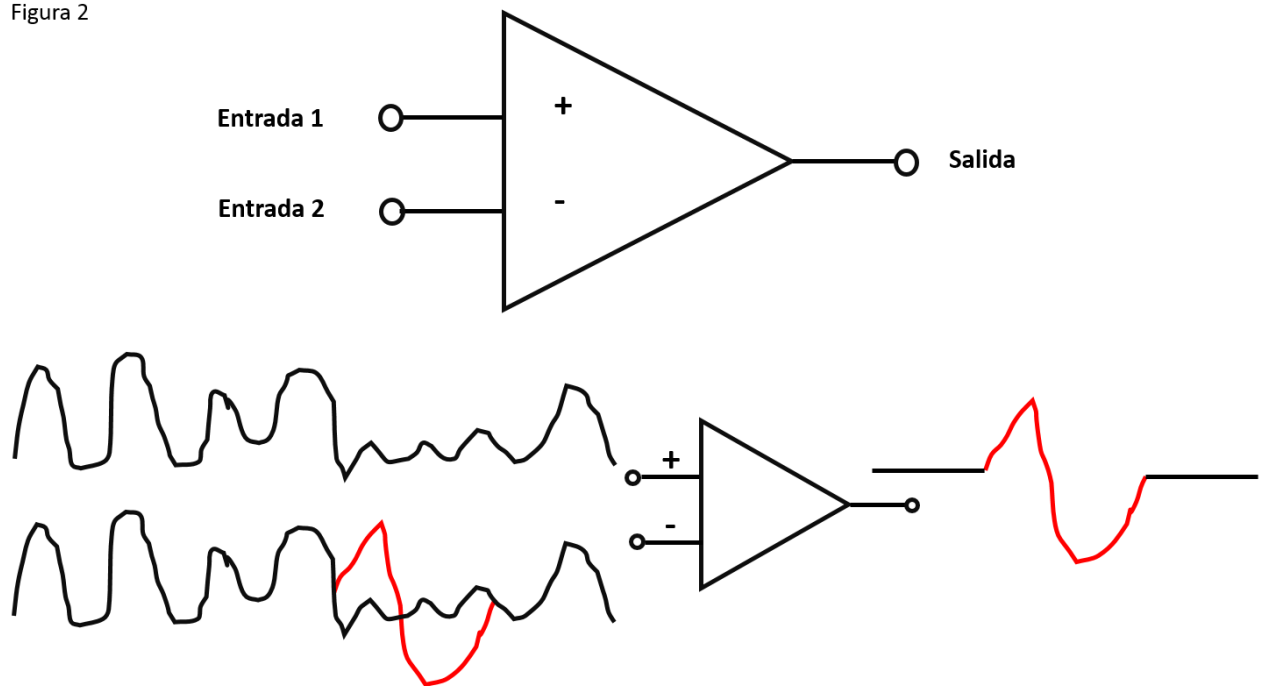

**Figura 3e** Escala del índice biespectral (BIS) y su correlación con el estado de consciencia/sedación y la morfología de onda del EEG.

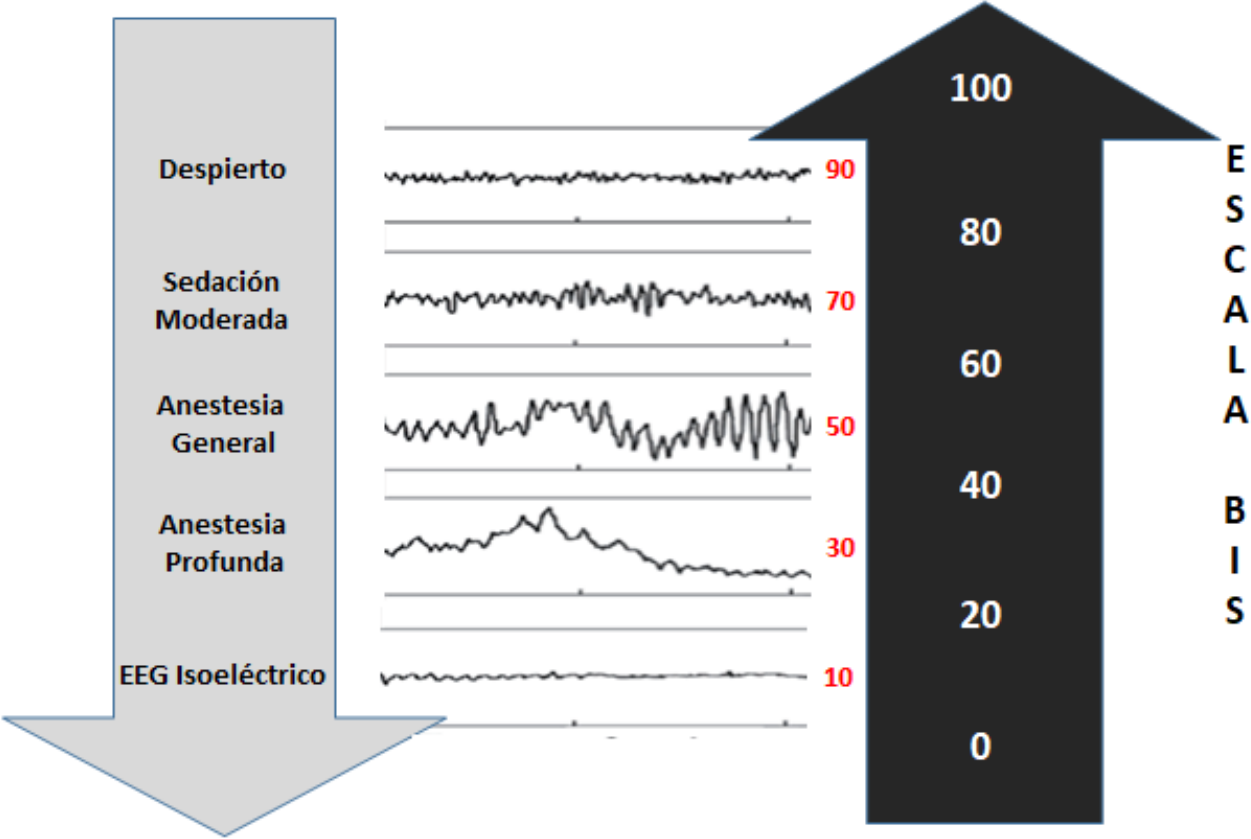

**Figura 4e** Ondas Trifásicas. El EEG de un paciente de 72 años de edad con sangrado intracerebral y drenaje extraventricular, complicado con ventriculitis. Nótese la primera fase es una deflexión negativa (hacia arriba, flecha roja); seguida por una positiva (hacia abajo, flecha negra) y luego por otra negativa (flecha azul), con un retraso de dirección anteroposterior, visualizándose la primera deflexión unos ~200 milisegundos antes que la última deflexión. Los cuadros rojos indican otras ondas trifásicas vistas en esta imagen del EEG.

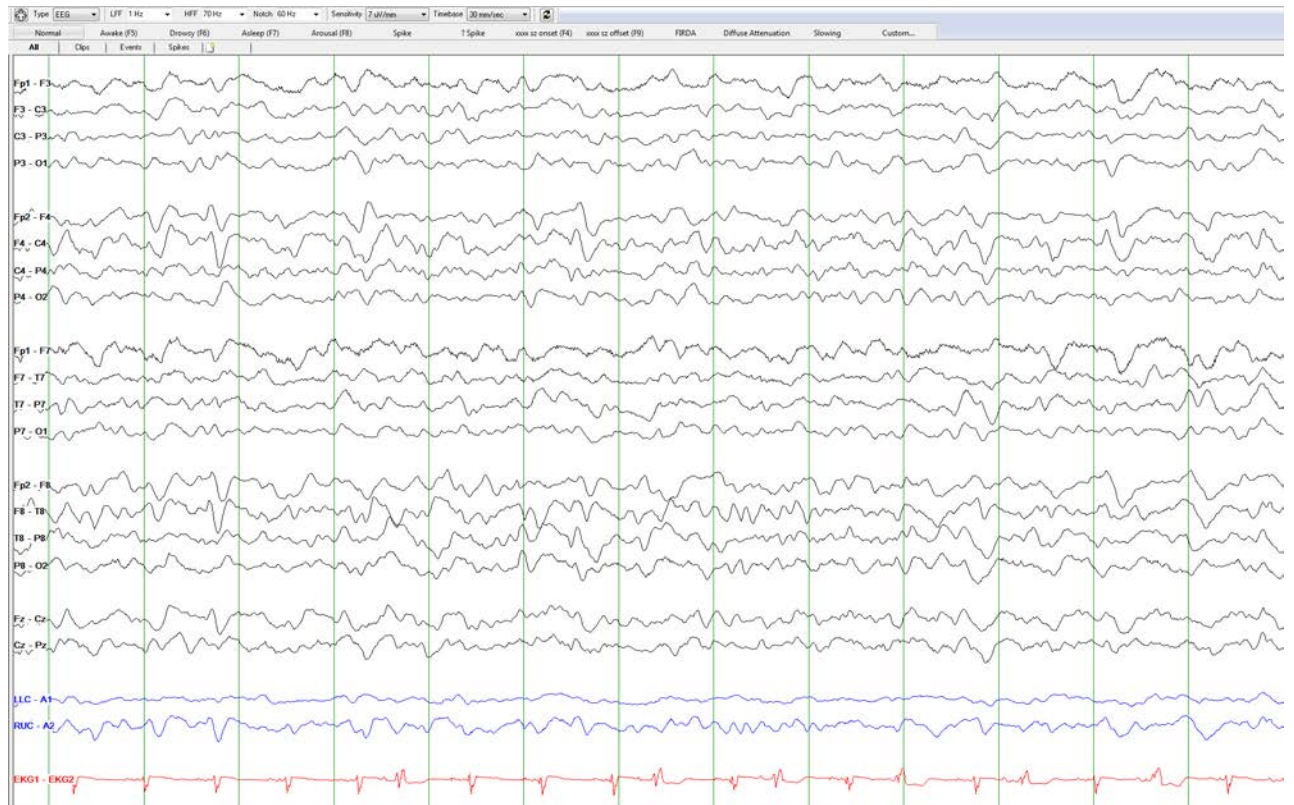

Supplement: mmc1 [file S217357271930133X:mmc1.pdf]
